# Supplementary material for: Impact of microclimatic conditions and resource availability on spring and autumn phenology of temperate tree seedlings
Source: PubMed Central journal article supplement (PMC8518844; doi:10.1111/nph.17606), 2021-08-16
Supplement: NPH-232-537-s001.pdf [file NPH-232-537-s001.pdf]

1 ***New Phytologist* Supporting Information**

2 Article title: Impact of microclimatic conditions and resource availability on spring  
3 and autumn phenology of temperate tree seedlings

4  
5 Authors: Yann Vitasse, Frederik Baumgarten, Constantin Zohner, Rungnapa Kaewthongrach,  
6 Yongshuo H. Fu, Manuel Walde, Barbara Moser

7  
8 Article acceptance date: 02 July 2021

9  
10 The following Supporting Information is available for this article (short titles):

11 **Table S1.** Seed material used in the experiment.

12 **Table S2.** Amount of total nitrogen (N), Nitrate ( $\text{NO}_3^-$ ) and ammonium ( $\text{NH}_4^+$ ) in the soil for  
13 each of the mesocosms at the end of the growing season (3 September 2019).

14 **Fig. S1.** Picture showing the experimental infrastructure used in the study.

15 **Fig. S3.** Soil moisture of the different treatments during the experiment.

16 **Fig. S3.** Air temperature at 2m height during the experiment.

17 **Fig. S4.** Daily minimum temperatures recorded within the bud from January 2020 until species-  
18 specific budburst in white, black, shade or fully exposed buds.

19 **Fig. S5.** Growing degree hours above 5°C from 1 February to budburst in the shade and sun  
20 treatment.

21 **Fig. S6.** Air temperature recorded at canopy height during summer 2019 in the shade and sun  
22 treatment.

23

24 **Table S1.** Seed material used in the experiment.

| <b>Species</b>                | <b>Provenance</b>             | <b>Latitude<br/>(°)</b> | <b>Longitude<br/>(°)</b> | <b>Elevation<br/>(m a.s.l.)</b> | <b>Height at<br/>plantation<br/>(cm)</b> | <b>Diameter at<br/>plantation<br/>(mm)</b> | <b>Shade<br/>tolerance<br/>index*</b> | <b>Drought<br/>tolerance<br/>index*</b> |
|-------------------------------|-------------------------------|-------------------------|--------------------------|---------------------------------|------------------------------------------|--------------------------------------------|---------------------------------------|-----------------------------------------|
| <i>Fagus<br/>sylvatica</i>    | Villorsonnens,<br>Switzerland | 46.71                   | 6.99                     | 740-760                         | 49.7                                     | 5.8                                        | 4.56±0.11                             | 2.4±0.43                                |
| <i>Fraxinus<br/>excelsior</i> | Lenzburg,<br>Switzerland      | 47.39                   | 8.15                     | 400                             | 45.8                                     | 5.1                                        | 2.66±0.13                             | 2.5±0.25                                |
| <i>Prunus<br/>avium</i>       | Liliental,<br>Germany         | 48.08                   | 7.68                     | 300-600                         | 67.4                                     | 6.3                                        | 3.33±0.33                             | 2.66±0.22                               |
| <i>Quercus<br/>robur</i>      | Derendingen,<br>Switzerland   | 47.20                   | 7.59                     | 450                             | 26.0                                     | 4.7                                        | 2.45±0.28                             | 2.95±0.31                               |

25 \*tolerance scales range from 0 (no tolerance) to 5 (maximal tolerance)±SE, extracted from  
 26 Niinemets and Valladares (2006).

27

28

29 **Table S2.** Amount of total carbon (C) nitrogen (N), nitrate (NO<sub>3</sub><sup>-</sup>) and ammonium (NH<sub>4</sub><sup>+</sup>) in the  
 30 soil for each of the mesocosms at the end of the growing season (3 September 2019).

| Plot ID | Treatment    | Species    | N (%) | C (%) | C:N (%) | Nitrate (mg/kg) | Ammonium (mg/kg) |
|---------|--------------|------------|-------|-------|---------|-----------------|------------------|
| 1       | Nutrient     | Beech/oak  | 0.050 | 1.824 | 36.5    | 201.15          | <0.32            |
| 2       | Water        | Beech/oak  | 0.039 | 1.580 | 40.5    | <3.92           | <0.32            |
| 3       | Sun          | Beech/oak  | 0.039 | 1.716 | 44.0    | <3.92           | <0.32            |
| 4       | Drought      | Beech/oak  | 0.039 | 1.619 | 41.5    | <3.92           | <0.32            |
| 5       | sham drought | Beech/oak  | 0.037 | 1.689 | 45.6    | <3.92           | <0.32            |
| 6       | Shade        | Beech/oak  | 0.037 | 1.644 | 44.4    | <3.92           | <0.32            |
| 7       | Water        | Beech/oak  | 0.035 | 1.551 | 44.3    | <3.92           | <0.32            |
| 8       | Nutrient     | Beech/oak  | 0.037 | 1.529 | 41.3    | <3.92           | <0.32            |
| 9       | Sun          | Beech/oak  | 0.032 | 1.436 | 44.9    | <3.92           | <0.32            |
| 10      | sham drought | Beech/oak  | 0.036 | 1.730 | 48.1    | <3.92           | 0.59             |
| 11      | Shade        | Beech/oak  | 0.034 | 1.646 | 48.4    | <3.92           | <0.32            |
| 12      | Drought      | Beech/oak  | 0.034 | 1.672 | 49.2    | <3.92           | <0.32            |
| 13      | Sun          | Beech/oak  | 0.040 | 1.724 | 43.1    | <3.92           | <0.32            |
| 14      | Nutrient     | Beech/oak  | 0.036 | 1.528 | 42.4    | 90.50           | 8.91             |
| 15      | Water        | Beech/oak  | 0.033 | 1.558 | 47.2    | <3.92           | <0.32            |
| 16      | Shade        | Beech/oak  | 0.041 | 1.783 | 43.5    | 60.26           | <0.32            |
| 17      | Drought      | Beech/oak  | 0.036 | 1.641 | 45.6    | <3.92           | <0.32            |
| 18      | sham drought | Beech/oak  | 0.037 | 1.646 | 44.5    | <3.92           | <0.32            |
| 1       | Nutrient     | Cherry/ash | 0.036 | 1.537 | 42.7    | 42.45           | <0.32            |
| 2       | Water        | Cherry/ash | 0.035 | 1.634 | 46.7    | <3.92           | <0.32            |
| 3       | Sun          | Cherry/ash | 0.033 | 1.545 | 46.8    | <3.92           | <0.32            |
| 4       | Drought      | Cherry/ash | 0.035 | 1.631 | 46.6    | <3.92           | <0.32            |
| 5       | sham drought | Cherry/ash | 0.033 | 1.672 | 50.7    | <3.92           | <0.32            |
| 6       | Shade        | Cherry/ash | 0.036 | 1.619 | 45.0    | <3.92           | <0.32            |
| 7       | Water        | Cherry/ash | 0.034 | 1.496 | 44.0    | <3.92           | <0.32            |
| 8       | Nutrient     | Cherry/ash | 0.036 | 1.644 | 45.7    | 46.59           | <0.32            |
| 9       | Sun          | Cherry/ash | 0.035 | 1.630 | 46.6    | <3.92           | <0.32            |
| 10      | sham drought | Cherry/ash | 0.034 | 1.669 | 49.1    | <3.92           | <0.32            |
| 11      | Shade        | Cherry/ash | 0.033 | 1.536 | 46.5    | <3.92           | <0.32            |
| 12      | Drought      | Cherry/ash | 0.034 | 1.657 | 48.7    | <3.92           | <0.32            |
| 13      | Sun          | Cherry/ash | 0.035 | 1.635 | 46.7    | <3.92           | <0.32            |
| 14      | Nutrient     | Cherry/ash | 0.037 | 1.668 | 45.1    | 20.61           | <0.32            |
| 15      | Water        | Cherry/ash | 0.034 | 1.543 | 45.4    | <3.92           | <0.32            |
| 16      | Shade        | Cherry/ash | 0.035 | 1.602 | 45.8    | <3.92           | <0.32            |
| 17      | Drought      | Cherry/ash | 0.036 | 1.930 | 53.6    | <3.92           | <0.32            |
| 18      | sham drought | Cherry/ash | 0.033 | 1.538 | 46.6    | <3.92           | <0.32            |

31

32

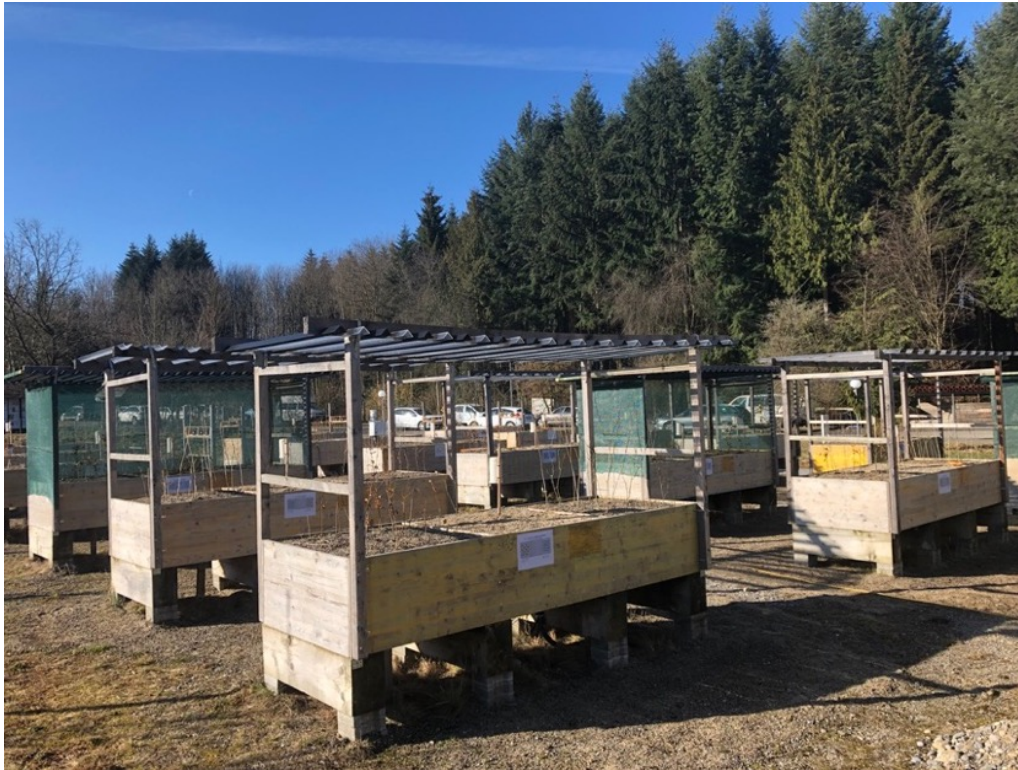

34

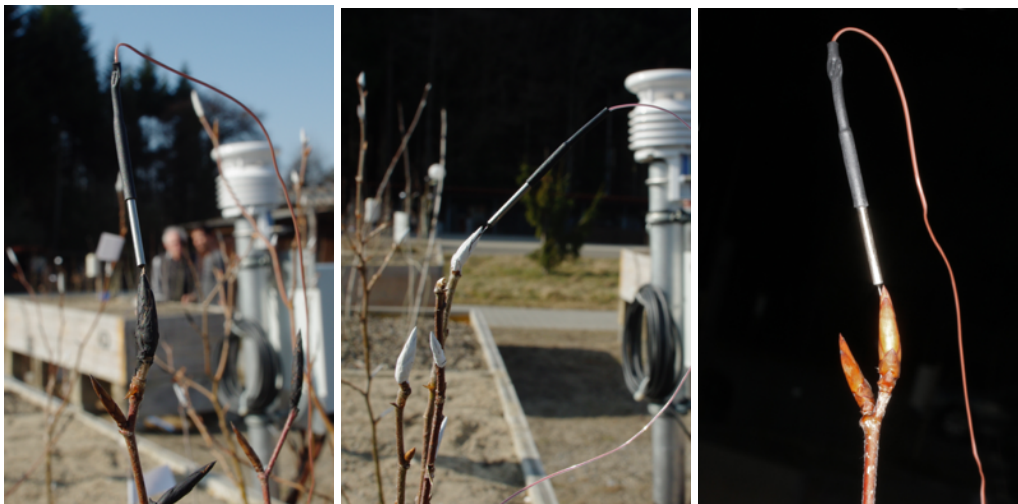

35

36 **Fig. S1.** Picture of the experimental infrastructure use in this study. The experimental set-up  
37 consisted of 36 containers (M1–M12) of 1 m x 1 m x 0.5 m arranged in sets of three per plot.  
38 The containers in the middle of each plot were filled with soil but did not contain any plants. On  
39 the picture is visible upfront the control-drought treatment (V-shaped plastic channels mounted  
40 downwards, covering 50% of the mesocosm surface), and towards the left and back of this plot,  
41 the drought treatment (V-shaped channels mounted upwards covering 50% of the mesocosm  
42 surface) and the shade treatment (covered from sides and top by a shading net intercepting about  
43 70% of the incoming solar radiation). The three pictures below show white-, black- and non-  
44 painted buds of beech with the thermocouple sensor inserted into the bud to record bud  
45 temperature. Pictures credit: all from Y. Vitasse, except the last with black background from U.  
46 Wasem.

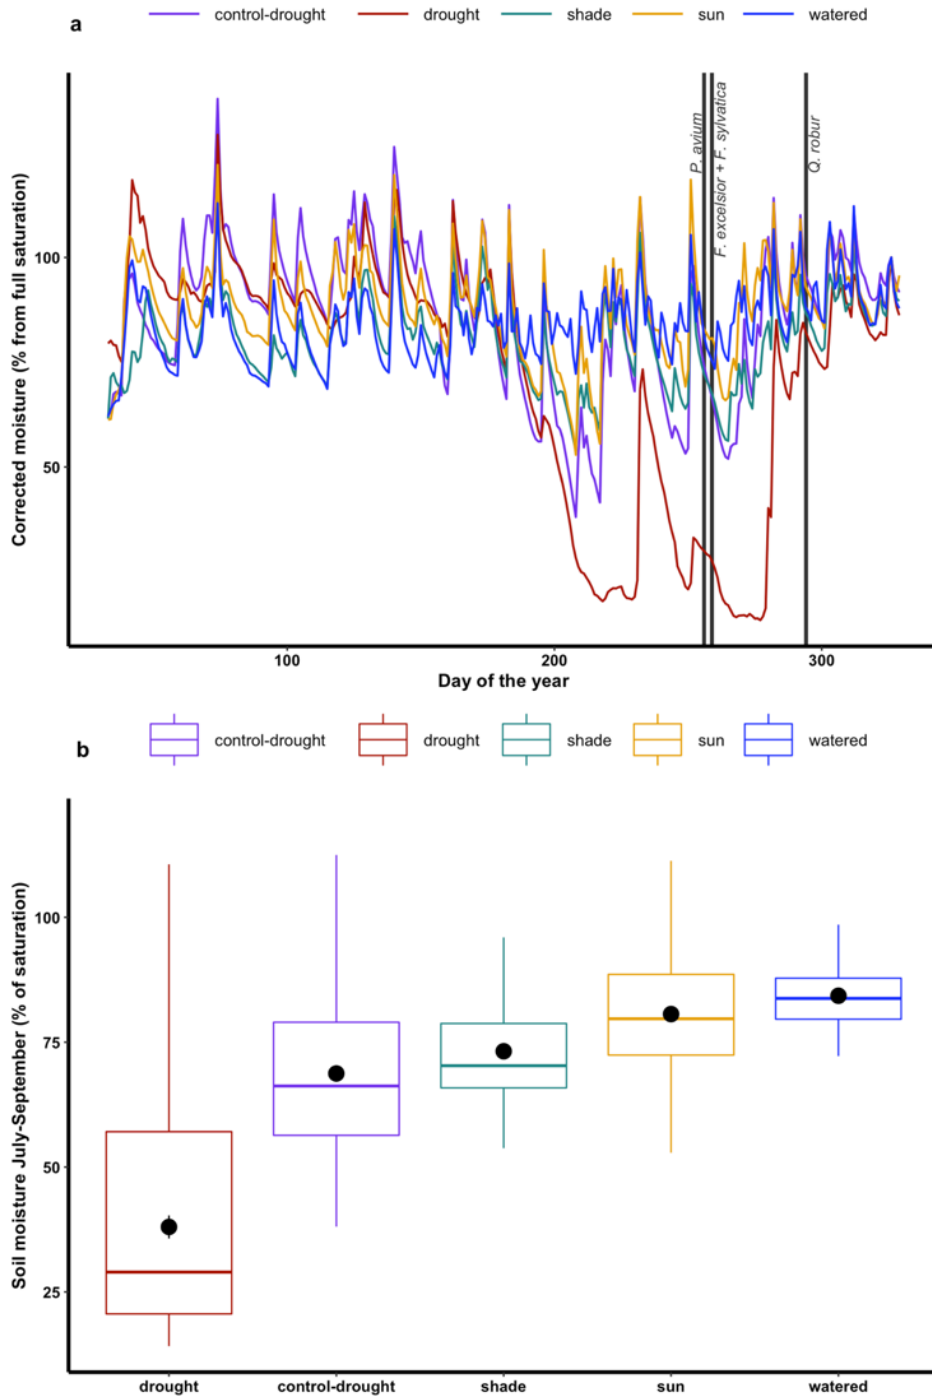

48

49 **Fig. S2.** Soil moisture of the different treatments shown as a percentage from full saturation  
 50 during the year 2019 (a), or averaged over summer from 1 July to 30 September 2019 (b).  
 51 Vertical lines in panel a represent the time when 50% leaf senescence was found for each species  
 52 across all treatment. Boxplots in panel b show the first quartile, median and third quartile  $\pm$   
 53 minimum and maximum values within 1.5 times the inter-quartile rang. Black dots represent the  
 54 mean value of each treatment.

55  
56  
57  
58

**Figure S3**

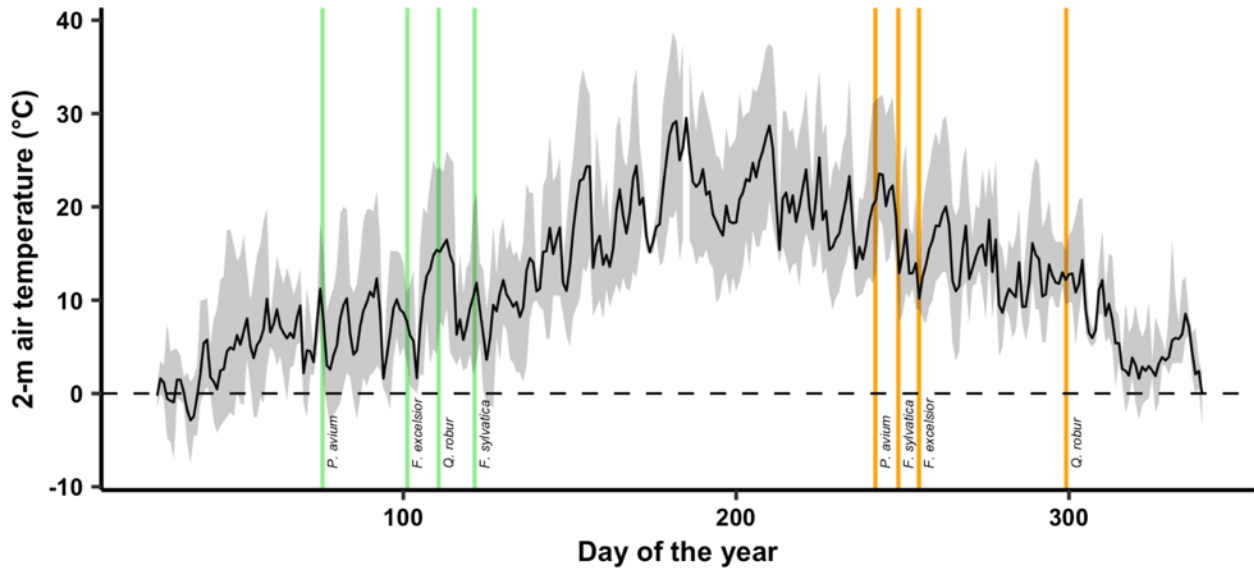

59  
60

61 **Fig. S3.** Daily minimum, mean and maximum temperature recorded at 2-m height from the  
62 ground under an aluminum shelter in 2019 positioned at 2-m height. Vertical lines represent the  
63 mean date of budburst date (green) and 50% leaf senescence (orange) for each species grown  
64 within the control treatment (sun treatment). The grey area represents the range between daily  
65 minimum and maximum temperature values.

66 **Figure S4**

67

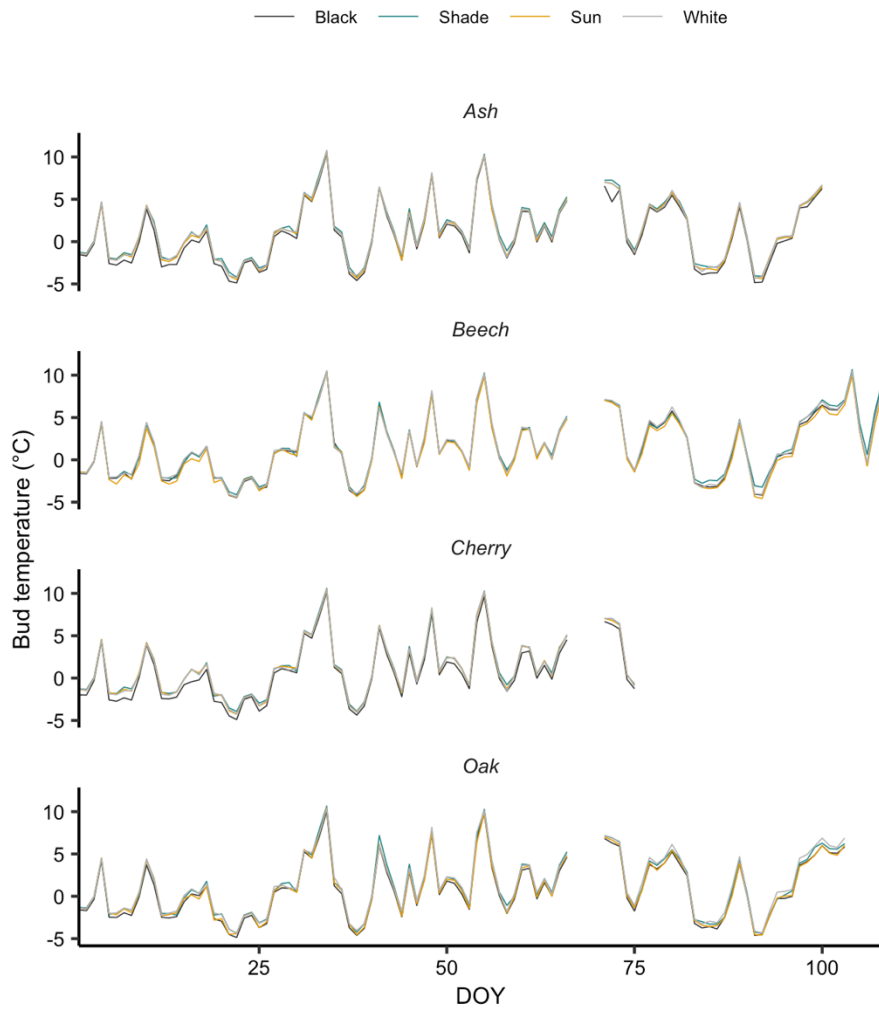

68

69 **Fig. S4.** Daily minimum temperatures recorded within the bud from January 2020 until species-  
70 specific budburst

71

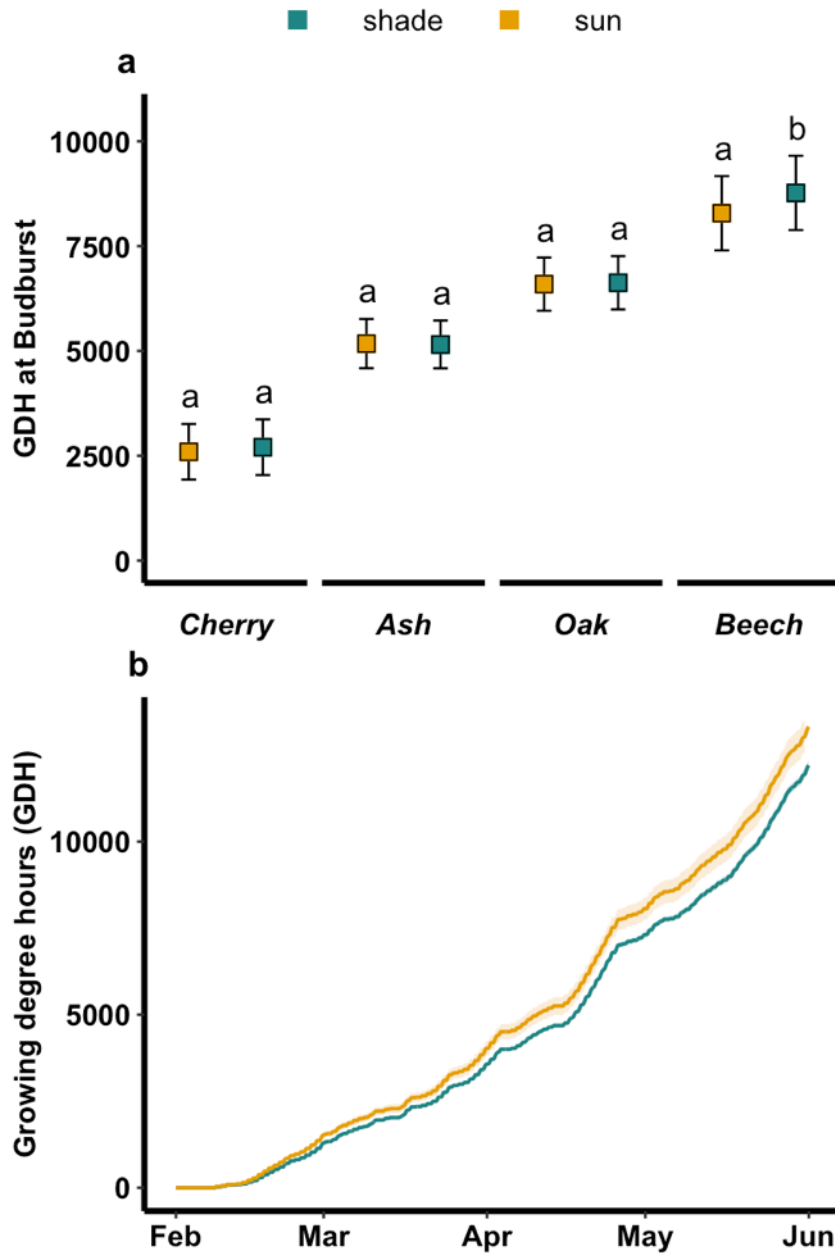

73

74

75 **Fig. S5.** Growing degree hours above 5°C recorded since 1 February 2019 until the species-  
 76 specific date of budburst (a), or until end of May across species plots (b). In panel a, values  
 77 correspond to the marginal mean estimates of the mixed effect ANOVA with blocks as random  
 78 factor. The error bars correspond to the confidence intervals at 95%. In panel b, values  
 79 correspond to the accumulation of growing degree hours surrounded by standard errors.  
 80 Temperature was recorded within the plot for each species, i.e. under either the shade or sun  
 81 treatment.  
 82



83 Figure S6

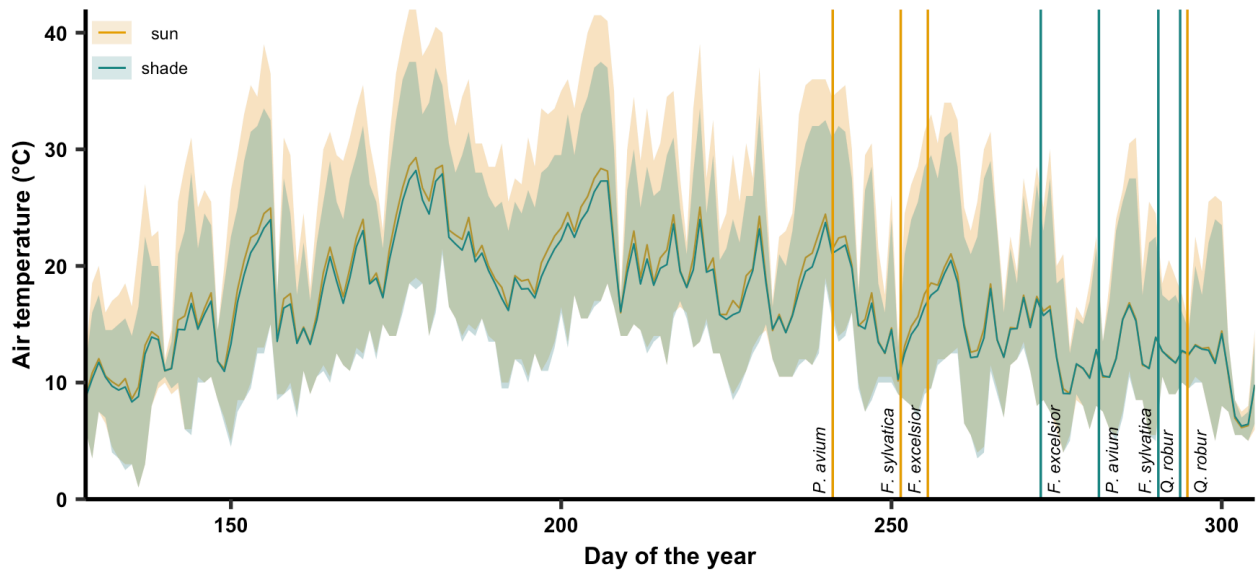

84

85 **Fig. S6.** Daily mean temperature surrounded by daily minimum and maximum temperature  
86 (shaded areas) recorded at canopy height in the sun and shade treatment. Vertical lines represent  
87 the mean date of 50% leaf senescence for each species grown either in the control treatment (sun  
88 treatment, yellow lines) or in the shade treatment (blue lines).

89

## 90 References

91 **Niinemets U, Valladares F. 2006.** Tolerance to shade, drought, and waterlogging of temperate  
92 Northern Hemisphere trees and shrubs. *Ecological Monographs* **76**(4): 521–547.

93
